# Supplementary material
Source: PubMed Central journal article supplement (PMC1500980)
Supplement: 7601198s2.pdf [file 7601198s2.pdf]

## Supplementary Information

### Materials and Methods.

**Immune complex kinase assays.** V-H69 and -H69 cells in SFM were washed three times in RPMI 1640, and  $2 \times 10^6$  cell aliquots were incubated in this medium for 30 min at 37°C. Cells were treated in the presence or absence of 40  $\mu$ M (TI-TITAT, (TI-TITAT or TITAT peptide for 4 h as indicated, prior to performing an immune complex kinase assay for S6K1 or S6K2 as described (Pardo et al., 2001). In separate experiments, HEK293Tet cells expressing tetracycline-inducible kinase active cytoplasmic forms of S6K1 or S6K2 were incubated with or without tetracycline prior to lysis and immune complex kinase assay.

**In vitro kinase assay.** 0.5  $\mu$ g recombinant His-S6K and 4  $\mu$ g recombinant PKC $\epsilon$  were incubated on ice in 50mM TRIS (pH 7.5), 100 mM NaCl, 0.1 mM EDTA and 0.1% TritonX-100, 0.3 (v/v)%  $\beta$ -mercaptoethanol and 1 mM Na<sub>3</sub>VO<sub>4</sub> in the presence or absence of recombinant active V600EB-Raf. The reaction was started by adding an ATP-mix resulting in a final concentration of 100  $\mu$ M ATP, 10mM MgCl<sub>2</sub> with or without 33 nCi/ $\mu$ l [ $\gamma$ -<sup>32</sup>P]ATP and incubated for 30 min at 30°C. As a positive control recombinant GST-MEK was used as a substrate for V600EB-Raf. Reactions were terminated in SDS-sample buffer and analysed by SDS-PAGE and autoradiography.

**RNAi sequences.** RNAi-mediated downregulation of PKC $\alpha$ , PKC $\epsilon$ , S6K1, S6K2, B-Raf and Raf-1 was achieved using short-hairpin sequences cloned into pSUPER Retro constructs or oligonucleotide siRNA and are listed in the supplementary data. For pSUPER Retro-mediated downregulation, each protein was simultaneously targeted using three different short-hairpin sequences. Sequences were as follow: PKC $\alpha$ ,  
..CAAGGCTTCCAGTGCCAAG, GGAACACATGATGGATGGA,  
CATGGAAGCTCAGGCAGAAA; PKC $\epsilon$ , TCTGCGAGGCCGTGAGCTT,  
CTACAAGGTCCTACCTTC, GGAAGGGATTCTGAATGGT; S6K1,  
GGTTCTGGGCCAGGGATCC, GCTCTATCTCATTCTGGAC,  
CATCATCACTCTGAAAGAT; S6K2, GGGGGGCTATGGCAAGGTG,  
CGGAATCCCAGCCAGCGGA, GATACGGCCTGCTTCTACC; B-Raf,  
CAACAGTTATTGGAATCTC, CCTATCGTTAGAGTCTTCC,  
GAATTGGATCTGGATCATT; Raf-1, CAGTGGTCAATGTGCGAAA,  
GAACTTCAAGTAGATTTC, CATCAGACAACTCTTATTG. Oligonucleotide siRNA against S6K2 and S6K1 were purchased from Dharmacon as SMARTpools.

Sequences were as follow: S6K2, GCAAGGAGUCUAUCCAUGAUU, GACGUGAGCCAGUUUGAUUU, GGAAGAAAACCAUGGAUAAUU, GGAACAUUCUAGAGUCAGUUU; AS, 5'-PACUGACUCUAGAAUGUCCUU; S6K1, GCAGGAGUGUUUGACAUAG, GACAAAUCCUCAAAUGUA, CAUGGAACAUUGUGAGAAA, CCAAGGUCAUGUGAAACUA. Oligonucleotide targeting of B-Raf was achieved using a single sequence: AAAGAAUUGGAUCUGGAUCAU.

**Reagents.** Etoposide was purchased from Calbiochem. PKC $\alpha$ , PKC $\beta$ , PKC $\delta$ , PKC $\lambda$ , PKC $\gamma$ , PKC $\zeta$ , PKC $\theta$ , PKC $\epsilon$ , Bcl-X<sub>L</sub> and XIAP antibodies were purchased from Becton Dickinson. The phospho-PKC $\alpha$  and phosphor-S6 protein antibody was from Cell Signalling. The phospho-PKC $\epsilon$  antibody against Ser729 and an additional PKC $\epsilon$  antibody (for Western-blotting only) were obtained from Upstate. The phospho-PKC $\epsilon$  antibody against Thr566 was as described previously (Parekh et al., 1999). S6K1, B-Raf, Raf-1, Lamin B and Actin antibodies were purchased from Santa Cruz. The S6K2 antibody was as described previously (Gout et al., 1998). Protein A and G were obtained from Amersham. Lipofectin, Lipofectamin Plus, G418, zeocin and puromycin were obtained from Invitrogen. The activated ERK antibody, etoposide, polybrene and crystal violet were obtained from Sigma. FGF-2, PD098059, Gö6976, Hispidin, BAPTA, Rottlerin and GF109203X were purchased from Calbiochem.
