# Supplementary material
Source: PubMed Central journal article supplement (PMC1500980)
Supplement: 7601198s3.pdf [file 7601198s3.pdf]

# Supp Figure 1

**A.**

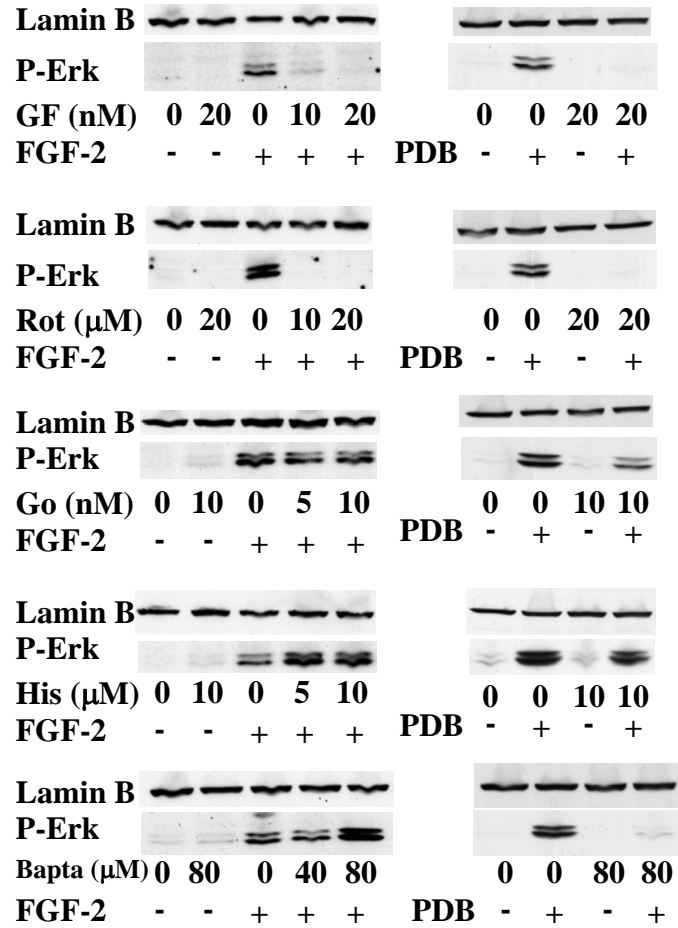

**B.**

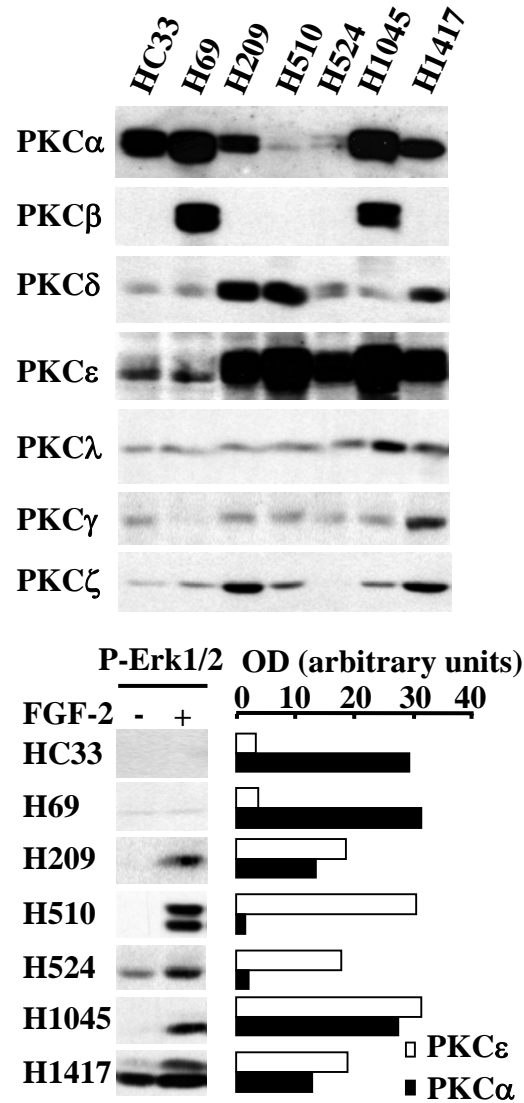

**Supplementary Figure 1: (A, B, C and D) PKC $\epsilon$  controls FGF-2-mediated Erk phosphorylation in SCLC cells.** (A) H510 cells were treated with or without a dose range of GF109203X (GF), Gö6976 (Go), Hispidin (His), BAPTA (BA) or Rottlerin (Rot) for 1 h prior to stimulation for 5 min in the presence or absence of either FGF-2 (0.1 ng/ml) or PDBu (400nM). Cell lysates were analysed by SDS-PAGE/Western-blotting for biphospho-ERK. Lamin immunodetection was used as loading control. (B-top panel) Equal protein amounts from SCLC cell lines were compared for their PKC expression pattern. (B-bottom panel) SCLC cells in SFM were stimulated with and without FGF-2 for 5 min and cell lysates analysed by SDS-PAGE/WB for Erk phosphorylation. PKC $\epsilon$  and PKC $\alpha$  levels (ODs from left panel) were compared to the ability to phosphorylate Erk in these SCLC cell lines. Results shown are representative of at least three independent experiments.
