# Supplementary material
Source: PubMed Central journal article supplement (PMC1500980)
Supplement: 7601198s5.pdf [file 7601198s5.pdf]

### Supp Figure 3

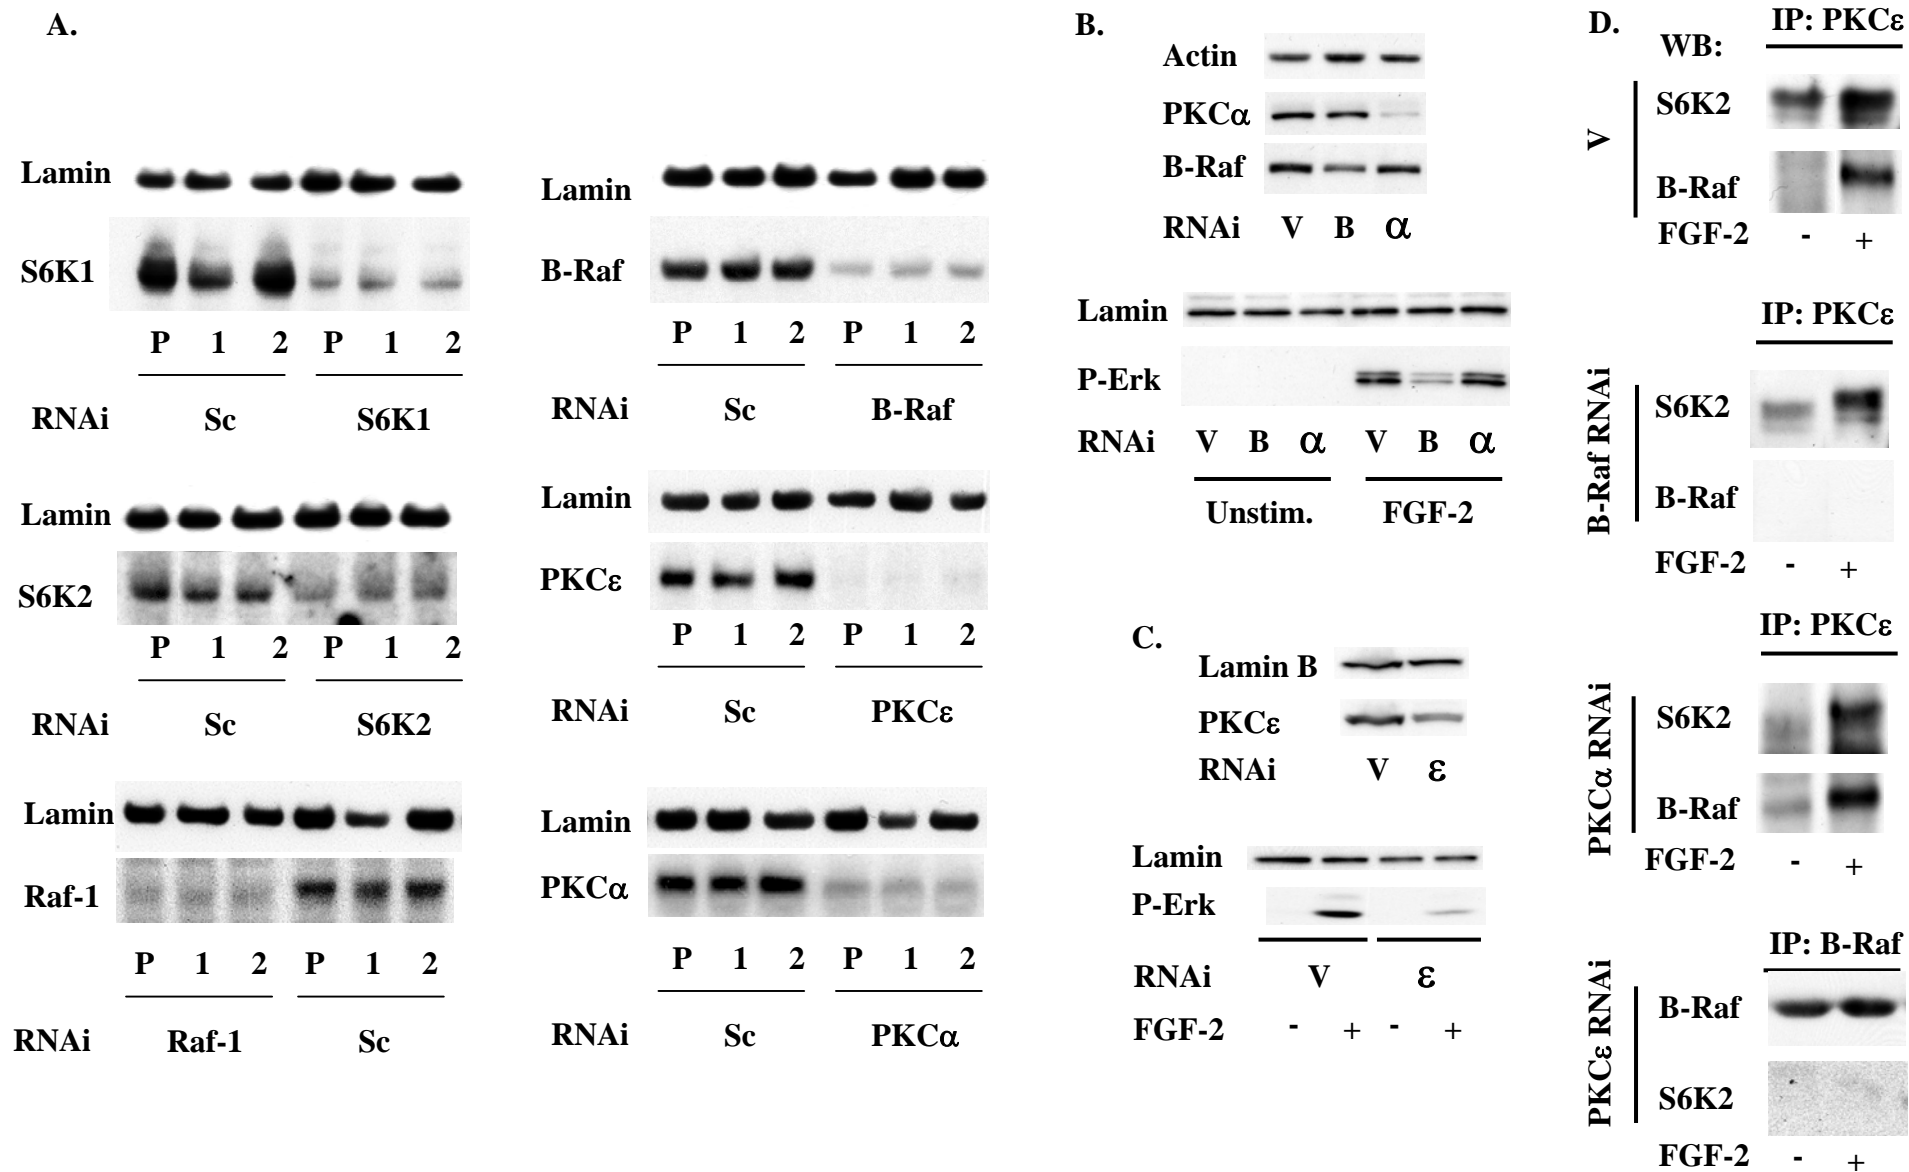

**Supplementary Figure 3: PKC $\epsilon$  is required for B-Raf association with S6K2.** (A) Efficacy of single siRNAi oligonucleotide sequences (1 and 2) and Smartpools (P) directed against S6K1, S6K2, PKC $\epsilon$ , PKC $\alpha$ , B-Raf and Raf-1. HEK293 cells were transfected with the oligonucleotides and lysates analysed for target downregulation 48h later by SDS-PAGE/WB. (B, C and D) PKC $\alpha$  ( $\alpha$ ) and B-Raf (B) or PKC $\epsilon$  ( $\epsilon$ ) were downregulated using pSR retroviral RNAi vectors in HEK293 cells and compared to empty vector only (V) transfected cells for their expression of the RNAi targets and their ability to phosphorylate Erk (B and C) or form the S6K2/PKC $\epsilon$ /B-Raf multiprotein complex (D) in response to FGF-2. (A-D) Results shown are representative of at least three independent experiments.
