# Supplementary material
Source: PubMed Central journal article supplement (PMC1500980)
Supplement: 7601198s6.pdf [file 7601198s6.pdf]

Supp Figure 4

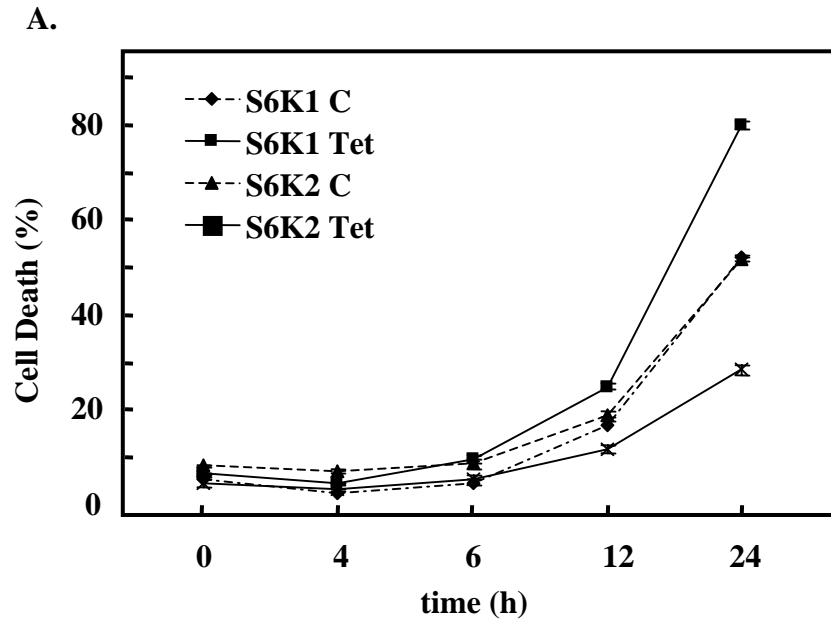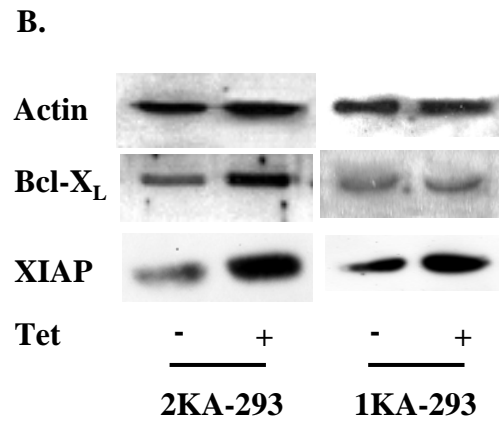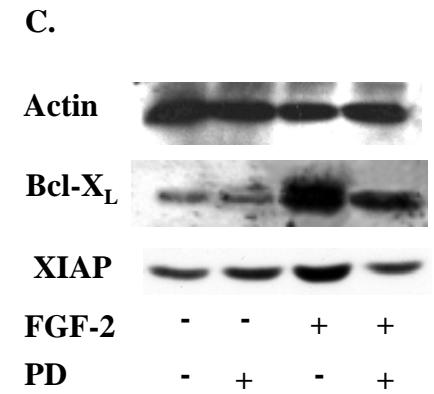

**Supplementary Figure 4: S6K2 kinase activity protects HEK293 cells from serum deprivation and induces expression of Bcl-X<sub>L</sub> and XIAP.** (A and B) HEK293 expressing tetracycline-inducible kinase-active S6K1 (1KA) or 2 (2KA) were treated with or without tetracycline for 6h (B) or the time indicated (A). (A) Cells were grown in the absence of FCS and a cell death time-course performed. Cell death was assessed microscopically by determining Trypan blue positivity. Results shown are averages  $\pm$  SEM of triplicates. (C) HEK293 cells were treated for 1h with or without 25 $\mu$ M PD098059 prior to stimulation with FGF-2 for 4h. (B and C) Cell lysates were analysed by SDS-PAGE/WB for the levels of Bcl-X<sub>L</sub> and XIAP. Actin was used as a loading control. Results shown are representative of at least three independent experiments.
