# Supplementary material
Source: PubMed Central journal article supplement (PMC1500980)
Supplement: 7601198s7.pdf [file 7601198s7.pdf]

Supp Figure 5

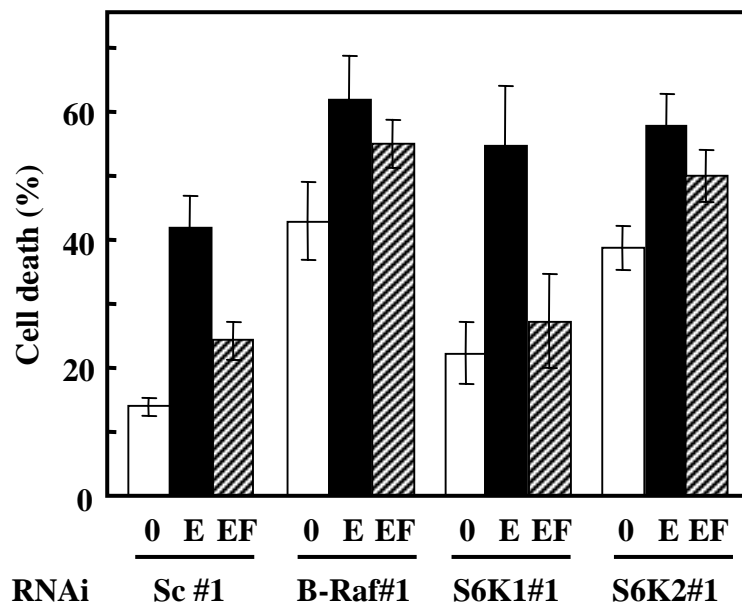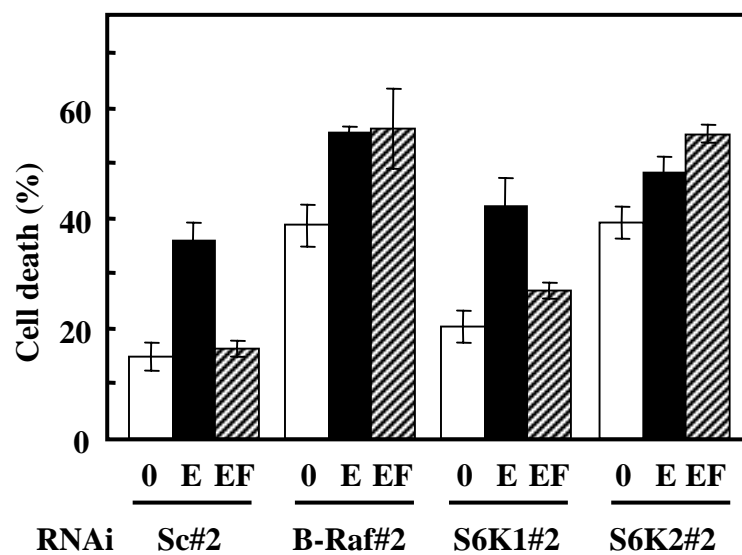

**Supplementary Figure 5: S6K2 and B-Raf but not S6K1 single siRNA sequences prevent FGF-2-mediated rescue of etoposide treated H510 cells.** H510 cells grown in SFM were transfected with either of two siRNA single sequences (#1 and #2 as shown in Fig 3A) targeting S6K1, S6K2 or B-Raf as indicated. Two non-targeting sequences (sc#1 and 2) were used as controls. Cells were pre-incubated for 4 h with FGF-2 (F) prior to etoposide (E) treatment. Cell death was determined microscopically by Trypan blue exclusion. Results shown are average  $\pm$  SEM of triplicates and are representative of at least three independent experiments.
